# Supplementary material for: Dupilumab Provides Clinically Meaningful Responses in Children Aged 6–11 Years with Severe Atopic Dermatitis: Post Hoc Analysis Results from a Phase III Trial
Source: PubMed Central journal article supplement — Am J Clin Dermatol. 2023 Jun 10;24(5):787–98. doi: 10.1007/s40257-023-00791-7 (PMC10460374; doi:10.1007/s40257-023-00791-7), 2023-06-10
Supplement: 40257_2023_791_MOESM1_ESM.pdf [file 40257_2023_791_MOESM1_ESM.pdf]

**Supplement: Dupilumab Provides Clinically Meaningful Responses in Children Aged 6–11 Years with Severe Atopic Dermatitis: Post hoc Analysis Results from a Phase III Trial**

**Running heading:** Dupilumab in Children with Severe Atopic Dermatitis: Post hoc Analysis Results from a Phase III Trial

Elaine C. Siegfried<sup>1,2</sup>, Michael J. Cork<sup>3,4</sup>, Norito Katoh<sup>5</sup>, Haixin Zhang<sup>6</sup>, Chien-Chia Chuang<sup>7</sup>, Ryan B. Thomas<sup>6</sup>, Ana B. Rossi<sup>7</sup>, Sonya L. Cyr<sup>6</sup>, Annie Zhang<sup>7</sup>

<sup>1</sup>Saint Louis University, St. Louis, MO, USA

<sup>2</sup>Cardinal Glennon Children's Hospital, St. Louis, MO, USA

<sup>3</sup>Sheffield Dermatology Research, Department of Infection, Immunity & Cardiovascular Disease, University of Sheffield, Sheffield Children's Hospital, Sheffield, UK

<sup>4</sup>Sheffield Children's Hospital Clinical Research Facility, Sheffield, UK

<sup>5</sup>Department of Dermatology, Kyoto Prefectural University of Medicine Graduate School of Medical Science, Kyoto, Japan

<sup>6</sup>Regeneron Pharmaceuticals Inc., Tarrytown, NY, USA

<sup>7</sup>Sanofi, Cambridge, MA, USA

**Corresponding author:** Annie Zhang

**Email:** [annie.zhang@sanofi.com](mailto:annie.zhang@sanofi.com)

**Funding** This research was sponsored by Sanofi and Regeneron Pharmaceuticals Inc. ClinicalTrials.gov Identifier: NCT03345914. The study sponsors participated in the study design; collection, analysis, and interpretation of the data; writing of the report; and the decision to submit the article for publication. Medical writing and editorial assistance were provided by Liselotte van Delden of Excerpta Medica, and was funded by Sanofi and Regeneron Pharmaceuticals Inc., according to the [Good Publication Practice guideline](#).

### **Conflict of interest**

Elaine C. Siegfried: Dermavant, Eli Lilly, Pfizer, Regeneron Pharmaceuticals Inc., Verrica Pharmaceuticals – consultant; GlaxoSmithKline, LEO Pharma, Novan – data and safety monitoring board; Eli Lilly, Janssen, Regeneron Pharmaceuticals, Inc., Stiefel, Verrica Pharmaceuticals – Principal Investigator in clinical trials. Michael J. Cork: AbbVie, Astellas Pharma, Boots, Dermavant, Galapagos, Galderma, Hyphens Pharma, Johnson & Johnson, LEO Pharma, L'Oréal, Menlo Therapeutics, Novartis, Oxagen, Pfizer, Procter & Gamble, Reckitt Benckiser, Regeneron Pharmaceuticals Inc., Sanofi – investigator and/or consultant. Norito Katoh: AbbVie, Celgene Japan, Janssen Pharmaceuticals, Kyowa Kirin, LEO Pharma, Lilly Japan, Maruho, Mitsubishi Tanabe Pharma, Sanofi, Taiho Pharmaceutical, Torii Pharmaceutical – speaker/consultant honoraria; A2 Healthcare, AbbVie, Boehringer Ingelheim Japan, Eisai, Janssen Pharmaceuticals, Kyowa Kirin, LEO Pharma, Lilly Japan, Maruho, Sun Pharma, Taiho Pharmaceutical, Torii Pharmaceutical – investigator grants. Haixin Zhang, Ryan B. Thomas, Sonya L. Cyr: Regeneron Pharmaceuticals Inc. – employees and shareholders. Chien-Chia Chuang, Ana B. Rossi, Annie Zhang: Sanofi – employees, may hold stock and/or stock options in the company.

**Fig. S1** Proportion of patients achieving EASI-50 or Peak Pruritus NRS  $\geq$  3-point improvement (FAS and IGA > 1 subgroup)

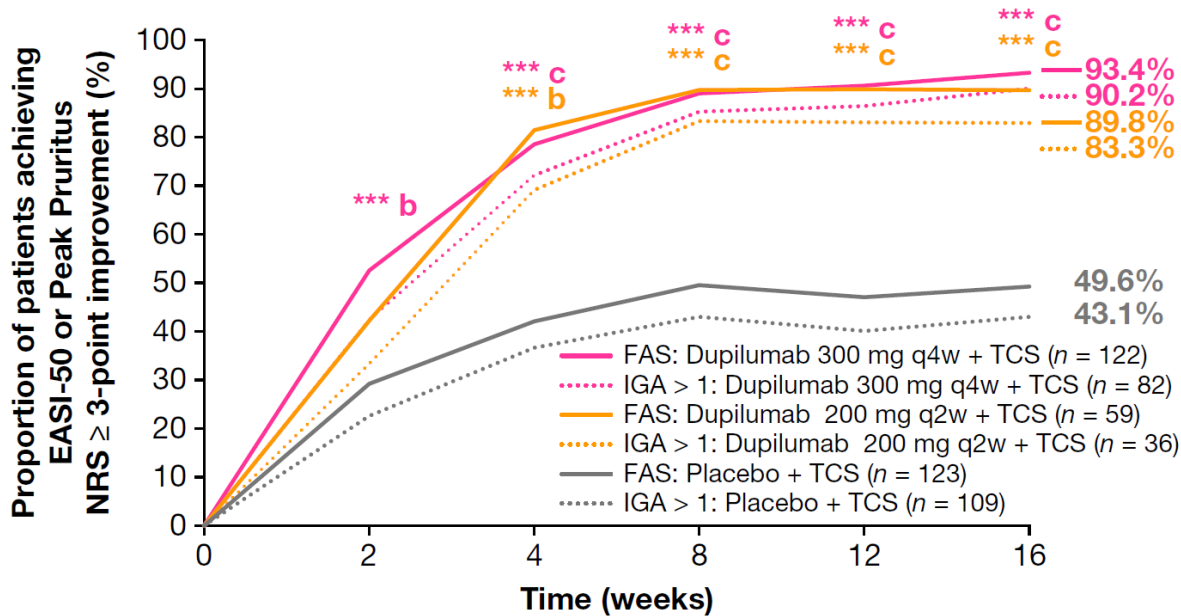

\*\*\* $p < 0.0001$  vs placebo (for FAS)

<sup>b</sup> $p < 0.01$  vs placebo, <sup>c</sup> $p < 0.0001$  vs placebo (for IGA > 1 subgroup)

EASI Eczema Area and Severity Index, EASI-50 improvement from baseline of at least 50% in EASI, FAS full analysis set, IGA Investigator's Global Assessment, PP-NRS Peak Pruritus Numerical Rating Scale, q2w every 2 weeks, q4w every 4 weeks, TCS topical corticosteroids

**Table S1.** Number of patients with adverse events reported in the overall safety analysis set and IGA > 1 subgroup

| Characteristic                                                                                                 | IGA > 1 subgroup ( <i>n</i> = 227)                |                                                   |                                       | FAS ( <i>n</i> = 304)                             |                                                    |                                    |
|----------------------------------------------------------------------------------------------------------------|---------------------------------------------------|---------------------------------------------------|---------------------------------------|---------------------------------------------------|----------------------------------------------------|------------------------------------|
|                                                                                                                | Dupilumab<br>200 mg q2w + TCS<br>( <i>n</i> = 36) | Dupilumab<br>300 mg q4w + TCS<br>( <i>n</i> = 80) | Placebo<br>+ TCS<br>( <i>n</i> = 106) | Dupilumab<br>200 mg q2w + TCS<br>( <i>n</i> = 59) | Dupilumab<br>300 mg q4w + TCS<br>( <i>n</i> = 120) | Placebo + TCS<br>( <i>n</i> = 120) |
| Patients with $\geq 1$ treatment-emergent adverse event, <i>n</i> (%)                                          | 23 (63.9)                                         | 54 (67.5)                                         | 77 (72.6)                             | 36 (61.0)                                         | 79 (65.8)                                          | 88 (73.3)                          |
| Patients with $\geq 1$ treatment-emergent adverse event leading to discontinuation of study drug, <i>n</i> (%) | 1 (2.8)                                           | 0                                                 | 2 (1.9)                               | 1 (1.7)                                           | 0                                                  | 2 (1.7)                            |
| Patients with $\geq 1$ treatment-emergent serious adverse event, <i>n</i> (%)                                  | 0                                                 | 2 (2.5)                                           | 2 (1.9)                               | 0                                                 | 3 (2.5)                                            | 2 (1.7)                            |
| Deaths, <i>n</i> (%)                                                                                           | 0                                                 | 0                                                 | 0                                     | 0                                                 | 0                                                  | 0                                  |

FAS full analysis set, IGA Investigator's Global Assessment, *q2w* every 2 weeks, *q4w* every 4 weeks, TCS topical corticosteroids
